# Supplementary material
Source: PubMed Central journal article supplement (PMC9376243)
Supplement: NIHMS1777237-supplement-Supplemental_Figures.pdf [file NIHMS1777237-supplement-Supplemental_Figures.pdf]

**Supplementary Figures:**

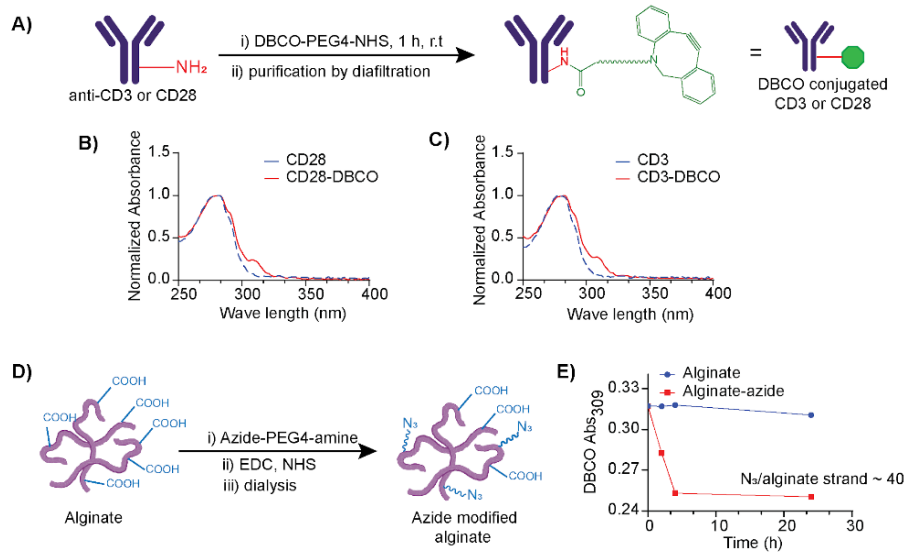

Supplementary Figure 1: Synthesis of MASTER components. A) schematic for conjugation of anti-CD3 and anti-CD28 antibodies with dibenzocyclooctyne (DBCO). B) UV-absorption spectra of DBCO-conjugated ant-CD28 antibody showing distinct absorption peak of DBCO at 309 nm. C) UV-absorption spectra of DBCO-conjugated anti-CD3 antibody showing distinct absorption peak of DBCO at 309 nm. D) Synthetic scheme for azide-modified alginate E) Quantification of number of azides per alginate strand

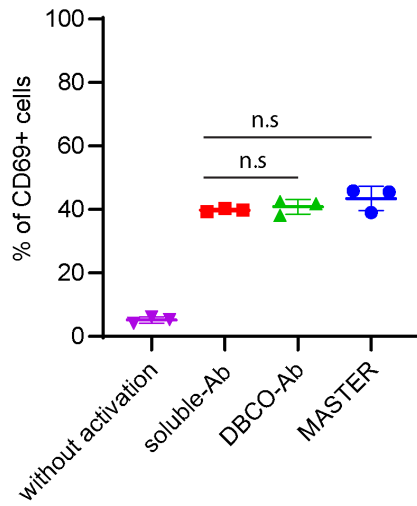

Supplementary Figure 2: CD69 expression in T cells seeded on plates with soluble antibodies, DBCO-conjugated antibodies and on MASTER (n.s = non-significant, unpaired t test). Equivalent amounts of antibodies were used for each group. Data represent mean  $\pm$  SD of three biologically independent samples.

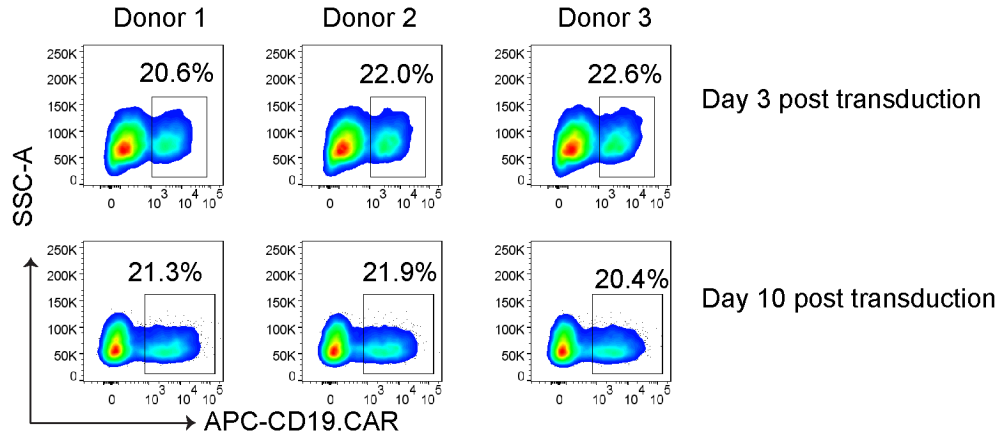

Supplementary Figure 3: FACS analysis of T cells on Day 3 and Day 10 post-transduction. T cells from three different donors were transduced with CD19.CAR encoding gamma retrovirus on MASTER and analyzed for CAR expression by flow cytometry.

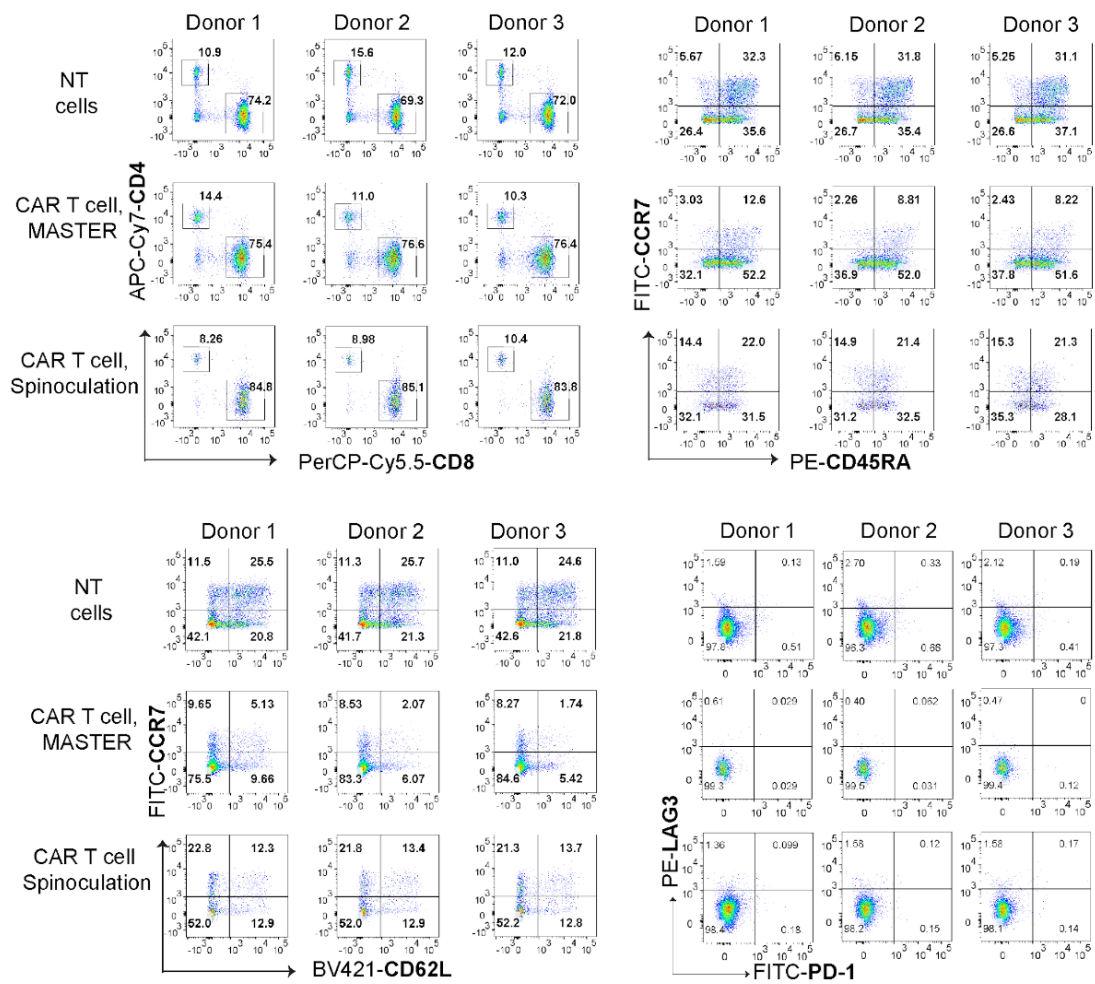

Supplementary Figure 4: Phenotypic characterization of produced CAR-T cells. CD4/CD8 (A), CD45RA/CCR7 (B), CD62L/CCR7 (C) and PD-1/LAG3 (D) expression in CAR-T cells from 3 different donors generated by MASTER or by spinoculation. The analyses were performed on CAR-expressing cells except for non-transduced (NT) cells.

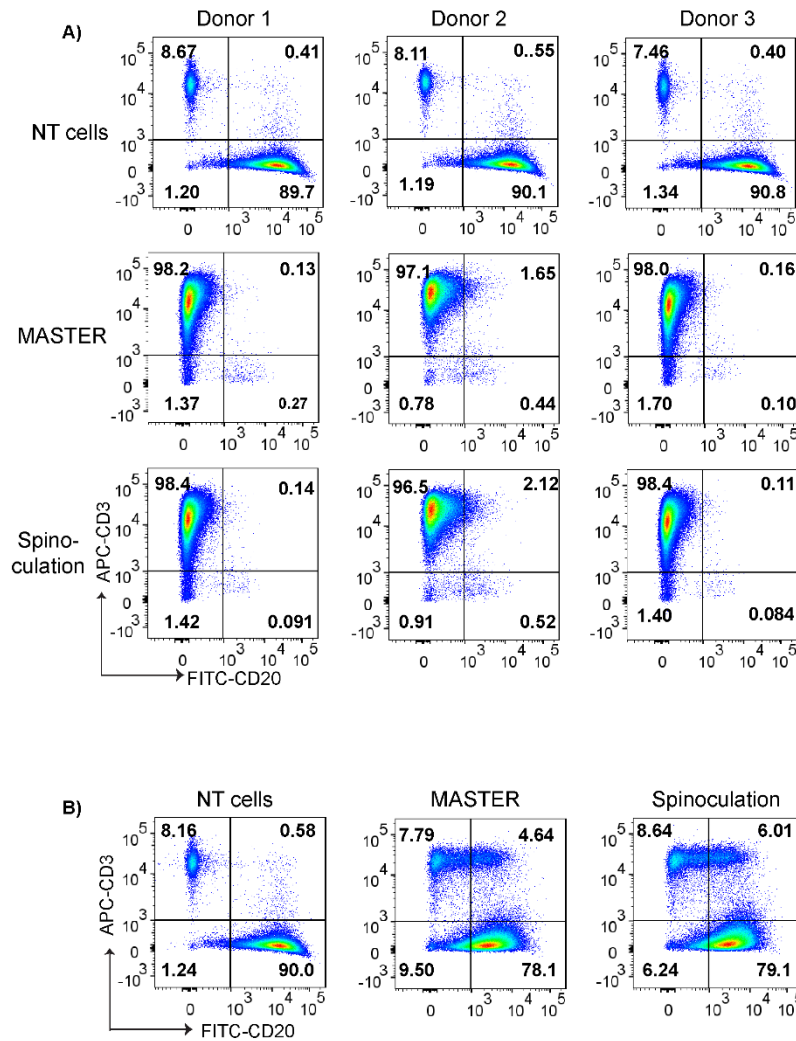

Supplementary Figure 5: CAR-T cells generated by MASTER-mediated transduction show toxicity against CD19<sup>+</sup> tumor cells (A) but not against CD19<sup>-</sup> U937 cells (B). CD19<sup>+</sup> tumor cells or CD19<sup>-</sup> U937 cells were co-cultured with control non-transduced cells (NT cells) or CD19.CAR-T cells generated by MASTER mediated transduction or by spinoculation at 1:5 E:T ratio and analyzed by FACS on day 5 of co-culture.

## Microscopic Observation from Blinded Veterinary Pathologist:

Key:

M1-M3: untreated controls

M4-M6: MASTER scaffolds

M7-M9: MASTER scaffolds seeded with mouse PBMCs and GFP-encoding retrovirus.

Images of heart, liver, lung, kidney, spleen and skin were examined from 9 mice. Images of some replicate sections of spleen and skin were included to optimize viewable sections of each tissue.

No noteworthy changes were observed in M1 or M2; all tissues were within normal limits. The only observation in M3 was a mild focal strain-related finding in the lung. This is common in C57BL6 mice and in some other strains and would not be related to experimental treatment.

Mice M4 - M9 all had subcutaneous pockets in the skin sections. These were bounded by thin fibrous capsules with a sparse macrophage component. The space of the pockets contained a faint meshwork of material admixed with a very few macrophages, and usually a small island of somewhat darker (more dense-appearing) material. Surrounding dermal connective tissue generally contained a slight infiltration of cells considered to be macrophages and presumably fibroblasts. No evidence of toxicity was observed in skin-associated skeletal muscle, adnexa or epidermis. No evidence of toxicity or other deleterious effect was observed in any of the other tissues examined.

| Sample                       | RBC<br>(M/ $\mu$ L) | WBC<br>(K/ $\mu$ L) | Neutrophil<br>(/ $\mu$ L) | Monocyte<br>(/ $\mu$ L) | Eosinophil<br>(/ $\mu$ L) | Basophil        | Lymphocyte<br>(%) | HCT<br>(%)     | Absolute<br>reticulocyte<br>(K/ $\mu$ L) | HGB<br>(g/dL)   | MCV<br>(fL)     | MCH<br>(pg)      | MCHC<br>(g/dL)   | Platelet Count<br>(K/ $\mu$ L) | Poikilocytosis | Polychromasia | Heinz bodies | Metamyelocyte (%) | Myelocyte | Promyelocyte (%) | Unclassified (%) |
|------------------------------|---------------------|---------------------|---------------------------|-------------------------|---------------------------|-----------------|-------------------|----------------|------------------------------------------|-----------------|-----------------|------------------|------------------|--------------------------------|----------------|---------------|--------------|-------------------|-----------|------------------|------------------|
| Untreated control            | 9.89 $\pm$ 0.5      | 7.8 $\pm$ 1.6       | 333.67 $\pm$ 24.4         | 352 $\pm$ 95.8          | 120 $\pm$ 57.4            | 7.66 $\pm$ 6.8  | 89.43 $\pm$ 1.6   | 45.8 $\pm$ 1.4 | 317.3 $\pm$ 46.54                        | 14.2 $\pm$ 0.9  | 46.3 $\pm$ 1.15 | 14.4 $\pm$ 0.17  | 30.96 $\pm$ 1.07 | 966 $\pm$ 65.19                | none seen      | slight        | None seen    | None seen         | None seen | None seen        | None seen        |
| MASTER                       | 10.09 $\pm$ 0.2     | 6.5 $\pm$ 0.4       | 331.33 $\pm$ 19.5         | 280 $\pm$ 56.8          | 131.3 $\pm$ 57.7          | 10.33 $\pm$ 9.6 | 88.4 $\pm$ 1.9    | 47 $\pm$ 1.63  | 360.6 $\pm$ 33.29                        | 14.3 $\pm$ 0.3  | 47 $\pm$ 1      | 14.36 $\pm$ 0.05 | 30.6 $\pm$ 0.34  | 945 $\pm$ 39.71                | none seen      | Moderate      | None seen    | None seen         | None seen | None seen        | None seen        |
| MASTER +<br>cells +<br>virus | 9.86 $\pm$ 0.5      | 6.06 $\pm$ 1.07     | 315.67 $\pm$ 47.1         | 219 $\pm$ 54.4          | 199.3 $\pm$ 88.7          | 6 $\pm$ 5.5     | 87.6 $\pm$ 1.6    | 45.8 $\pm$ 0.7 | 335 $\pm$ 44.23                          | 14.03 $\pm$ 0.5 | 46.6 $\pm$ 1.5  | 14.23 $\pm$ 0.2  | 30.6 $\pm$ 0.66  | 967 $\pm$ 144.8                | none seen      | Moderate      | None seen    | None seen         | None seen | None seen        | None seen        |

Supplementary Figure 6: Biocompatibility of MASTER and its components as revealed by biochemical analysis of mouse blood. MASTER and MASTER + mouse PBMCs + GFP encoded gamma retrovirus were implanted in the subcutaneous space of C57Bl6/J immunocompetent mice (n=3). Untreated mice were kept as controls.

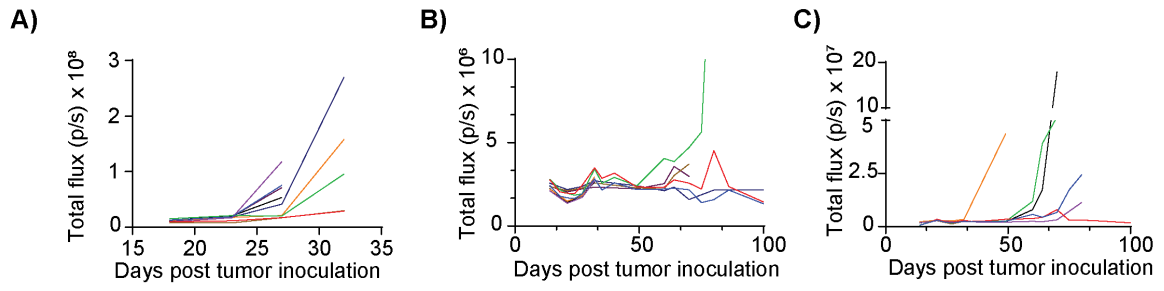

Supplementary Figure 7: Individual tumor growth curves of mice treated with NT cells (A), MASTER (B) or i.v. infused with CAR T cells (C). Each line represents one animal. Data are shown for nine mice per treatment condition.

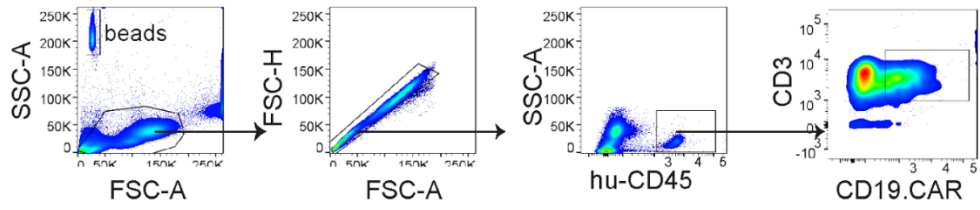

Supplementary Figure 8: Gating strategy for detection of CAR+ cells in blood, bone marrow or spleen.



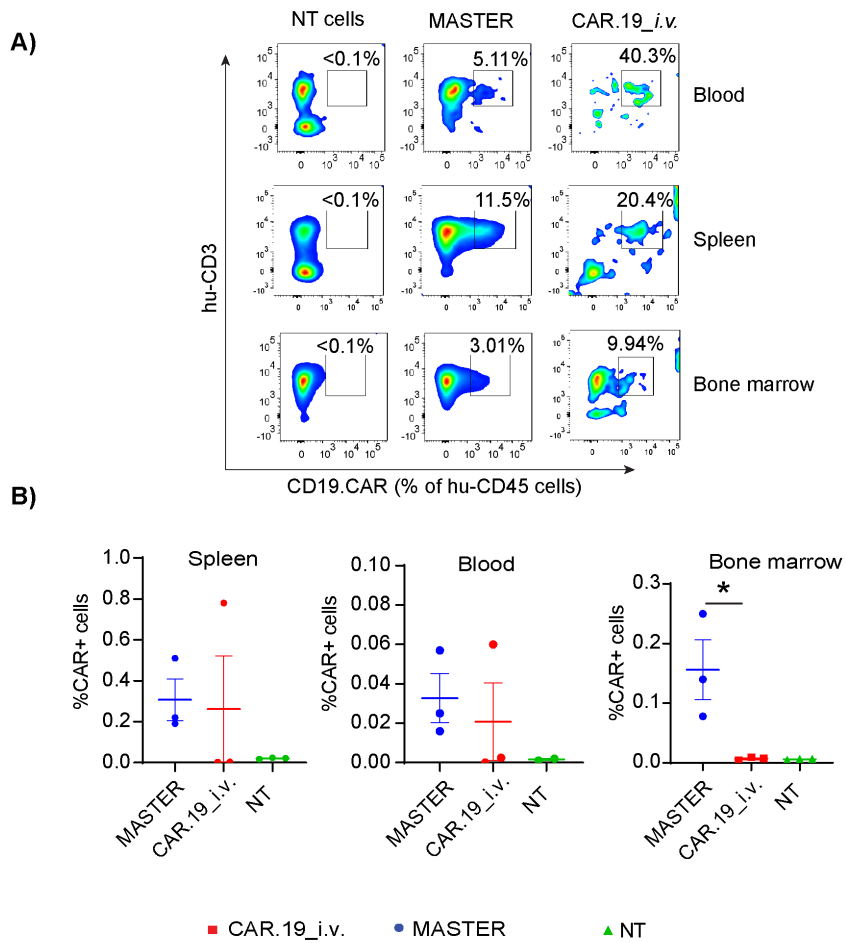

Supplementary Figure 9: A) Representative flow cytometry plots showing human CD45+CD3+CAR+ cells isolated from blood, bone marrow and spleen of mice (n=3) at day 32 post tumor cell inoculation. B) % of human CD3+CAR+ of total cells in in blood, bone marrow and spleen of mice euthanized at day 32 after tumor cell inoculation, as determined by flow cytometry. Data in f-h represent mean  $\pm$  SEM of three experimental replicates
